# Supplementary material for: Towards injured joint rehabilitation: structural color hydrogels for accelerated wound healing and rehabilitation exercise monitoring
Source: Royal Society of Chemistry journal article supplement (doi:10.1039/d4tb02673j), 2025-01-01
Supplement: d4tb02673j1.pdf [file d4tb02673j1.pdf]

Supporting Information

**Towards injured joints rehabilitation: structural color hydrogels for accelerated wound  
healing and rehabilitation exercises monitoring**

*Xiaoning Sun,<sup>a</sup> Dengfeng Lu,<sup>a</sup> Jing Cheng,<sup>a</sup> Zixin Shu,<sup>a</sup> Chunmei Ding,<sup>\*a</sup> Meng Qin<sup>\*a</sup> and Jianshu Li<sup>\*abc</sup>*

<sup>a</sup> College of Polymer Science and Engineering, National Key Laboratory of Advanced Polymer Materials, Sichuan University, Chengdu 610065, China.

\* E-mail: dingcm@scu.edu.cn; qinmeng@scu.edu.cn; jianshu\_li@scu.edu.cn

<sup>b</sup> State Key Laboratory of Oral Diseases, West China Hospital of Stomatology, Sichuan University, Chengdu 610041, China

<sup>c</sup> Med-X Center for Materials, Sichuan University, Chengdu 610041, China

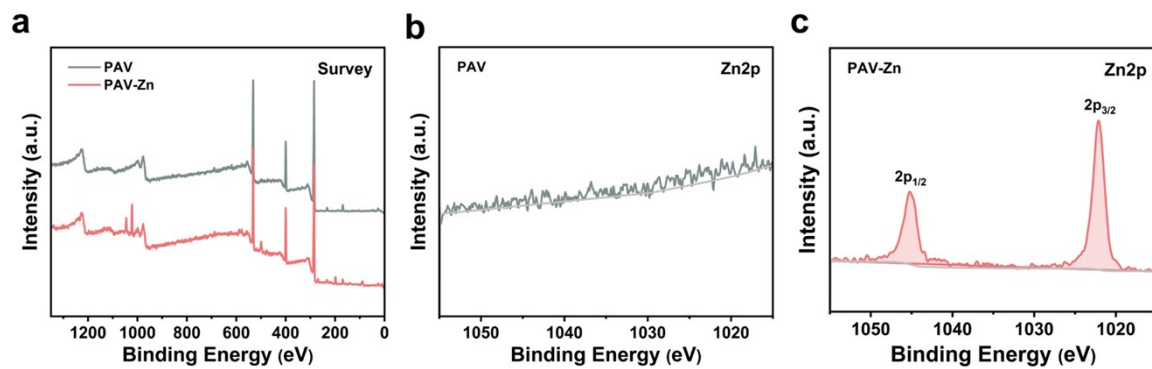

**Figure S1.** XPS spectra of a) PAV and PAV-Zn, b) Zn2p spectra of PAV, and c) Zn2p spectra of PAV-Zn.

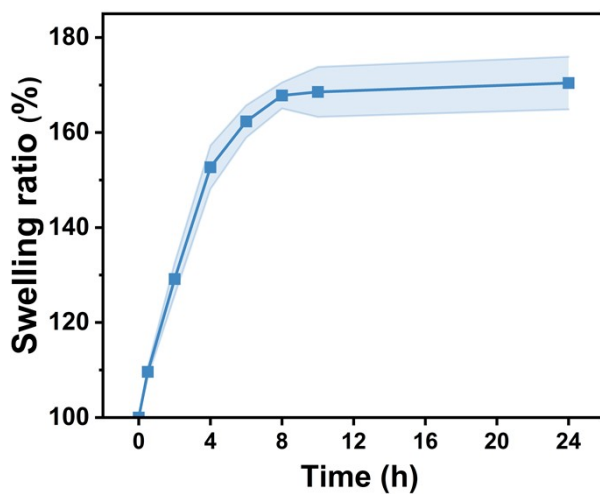

**Figure S2.** Swelling ratio of the hydrogel in PBS at different time points.

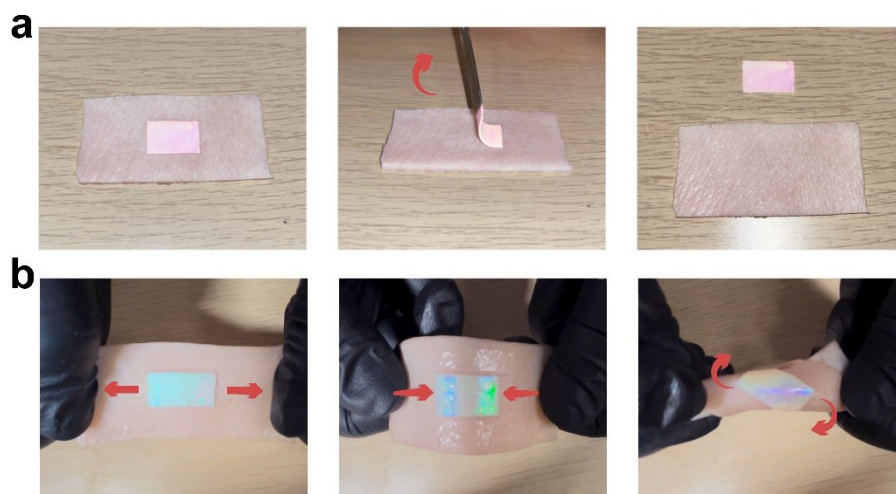

**Figure S3.** Adhesiveness testing of the structural color hydrogel. a) Attachment, peeling, and removal of structural color hydrogel on pig skin. b) Stretching, bending, and twisting of structural color hydrogel fixed on pig skin using 3M dressing.

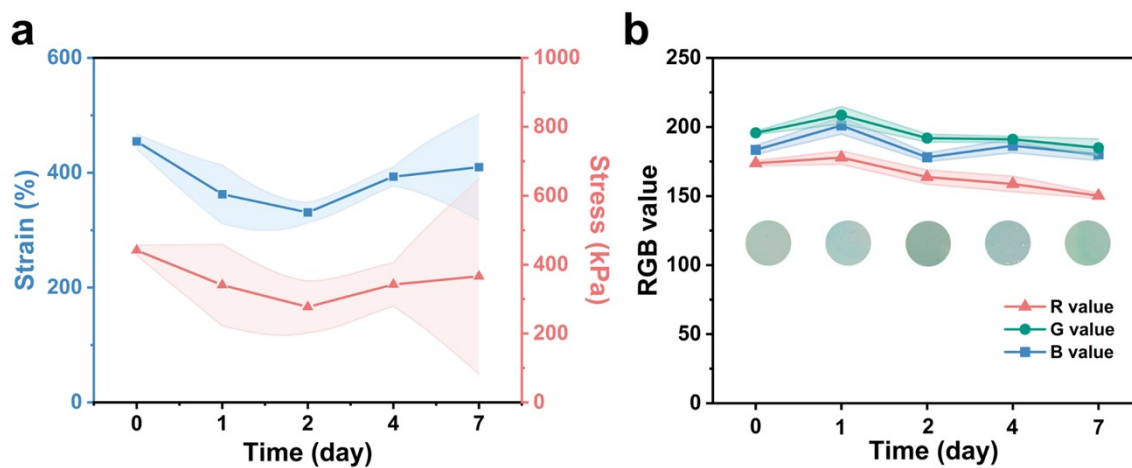

**Figure S4.** Mechanical and color properties of PAV-Zn structural color hydrogel immersed in PBS for seven days.

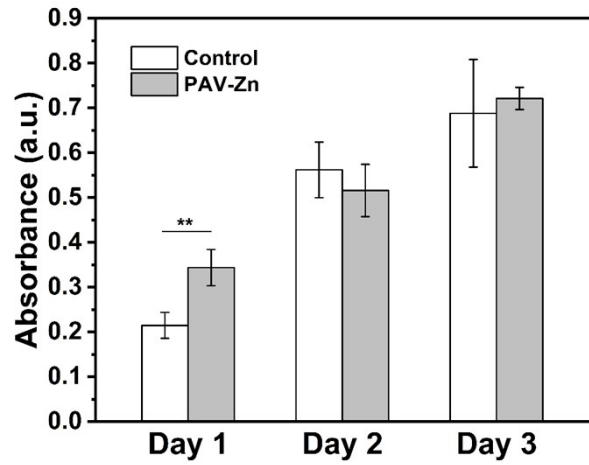

**Figure S5.** Metabolic activity of L929 cells cultured in hydrogel dispersions for 24 h, 48 h and 72 h quantified using the CCK-8 assay (n = 3, mean ± SD, \*\* $p < 0.01$  compared to Control at each time point).

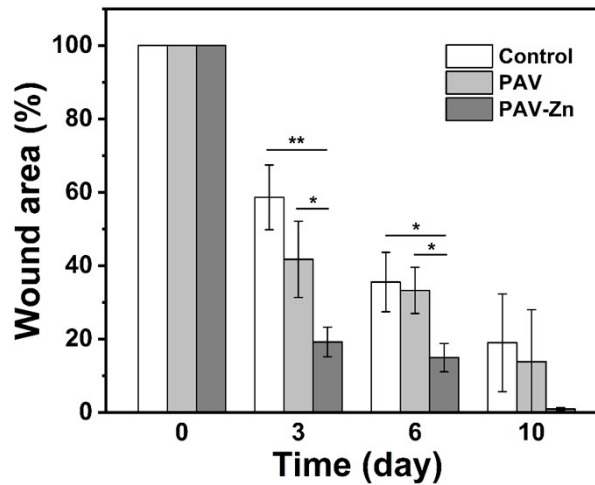

**Figure S6.** Wound area for each group (n = 3, mean ± SD, \* $p < 0.05$ , \*\* $p < 0.01$  and \*\*\* $P < 0.001$ ).

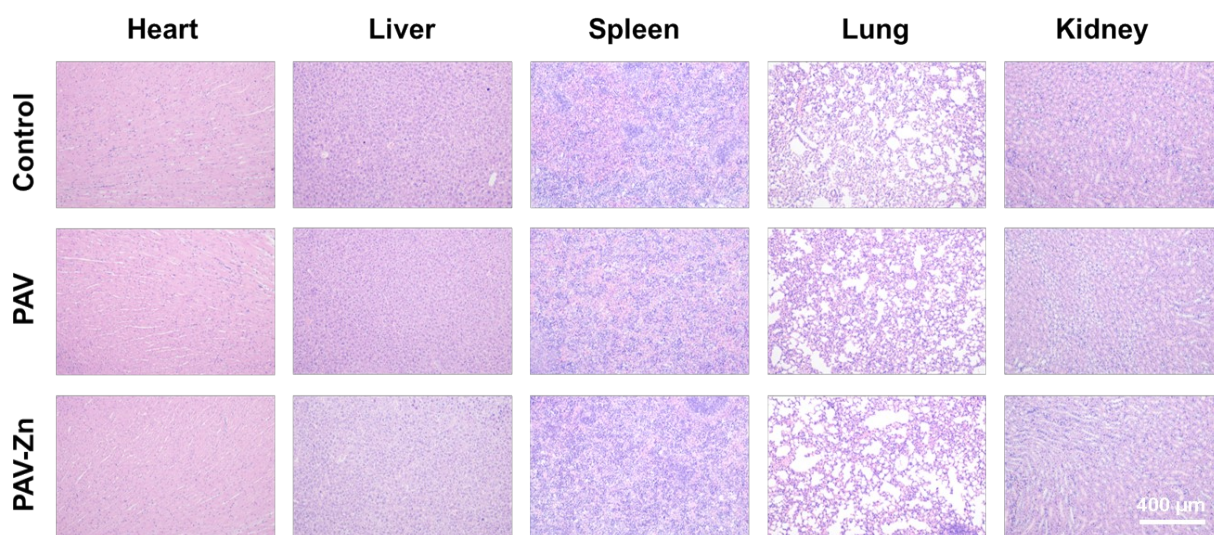

**Figure S7.** Histological analyses of the major organs (heart, liver, spleen, lungs, and kidneys) on day 10.

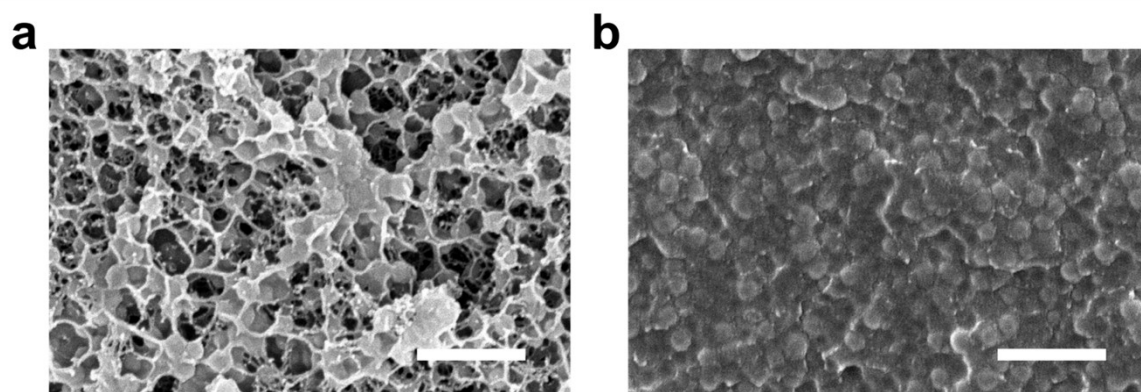

**Figure S8.** The SEM images of photonic crystal hydrogels of a) PAV and b) PAV-Zn. The scale bar is 1  $\mu\text{m}$ .

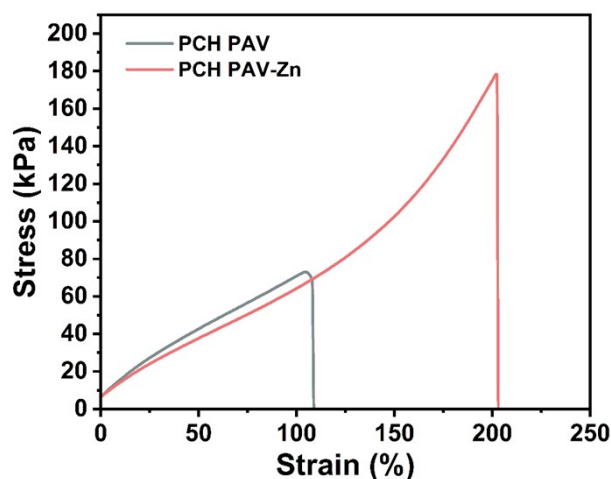

**Figure S9.** Stress-strain curves of photonic crystal hydrogels of PAV (PCH PAV) and PAV-Zn (PCH PAV-Zn) with 0.5 mol% MBAA content.

**Table S1.** Changes of  $L^*$ ,  $a^*$  and  $b^*$  of each group of structural color hydrogels with different crosslinker contents as stress changes.

| MBAA content | Strain (%) | $L^*$    | $a^*$    | $b^*$    | $\Delta L$ | $\Delta a$ | $\Delta b$ | $\Delta E$ |
|--------------|------------|----------|----------|----------|------------|------------|------------|------------|
| 0.5 mol%     | 0          | 52.09133 | 0.779333 | -20.92   | 0          | 0          | 0          | 0          |
|              | 12         | 51.18633 | 7.762333 | -19.1913 | -0.905     | 6.983      | 1.728667   | 7.25049    |
|              | 24         | 54.48133 | 10.27667 | -19.113  | 2.390003   | 9.497334   | 1.807      | 9.958751   |
|              | 36         | 56.709   | 5.594333 | -9.81233 | 4.61767    | 4.815      | 11.10767   | 12.95714   |
|              | 48         | 62.25367 | -14.4033 | -0.08067 | 10.16234   | -15.1827   | 20.83933   | 27.71397   |
|              | 60         | 67.14233 | -37.895  | 13.92233 | 15.051     | -38.6743   | 34.84233   | 54.18694   |
|              | 72         | 74.67967 | -52.4643 | 23.947   | 22.58834   | -53.2437   | 44.867     | 73.19951   |
|              | 80         | 73.58567 | -52.524  | 22.946   | 21.49434   | -53.3033   | 43.866     | 72.3013    |
|              | 96         | 70.38233 | -44.4267 | 17.04467 | 18.291     | -45.206    | 37.96467   | 61.80177   |

**Table S1. Cont.**

| MBAA content | Strain (%) | $L^*$    | $a^*$    | $b^*$    | $\Delta L$ | $\Delta a$ | $\Delta b$ | $\Delta E$ |
|--------------|------------|----------|----------|----------|------------|------------|------------|------------|
| 1 mol%       | 0          | 57.77    | 3.282667 | 2.276333 | 0          | 0          | 0          | 0          |
|              | 6          | 60.27533 | 0.430667 | -0.86433 | 2.505333   | -2.852     | -3.14067   | 4.926904   |
|              | 12         | 59.34933 | -3.86267 | -4.61233 | 1.579333   | -7.14533   | -6.88867   | 10.05007   |
|              | 18         | 56.77767 | -10.0957 | -9.20333 | -0.99233   | -13.3783   | -11.4797   | 17.65637   |
|              | 24         | 56.013   | -10.873  | -16.969  | -1.757     | -14.1557   | -19.2453   | 23.95522   |
|              | 30         | 54.67267 | -9.47467 | -25.368  | -3.09733   | -12.7573   | -27.6443   | 30.60314   |
|              | 40         | 51.58133 | -3.48367 | -32.5983 | -6.18867   | -6.76633   | -34.8747   | 36.06002   |
|              | 50         | 52.01933 | 1.491667 | -38.8813 | -5.75067   | -1.791     | -41.1577   | 41.59605   |
|              | 60         | 54.81333 | 4.376    | -43.3443 | -2.95667   | 1.093333   | -45.6207   | 45.72945   |
| 2 mol%       | 0          | 78.86867 | 6.372333 | -5.536   | 0          | 0          | 0          | 0          |
|              | 4          | 69.238   | 5.113667 | -6.35567 | -9.63067   | -1.25867   | -0.81967   | 9.747097   |
|              | 8          | 63.85133 | 5.296333 | -7.41367 | -15.0173   | -1.076     | -1.87767   | 15.17247   |
|              | 12         | 65.49933 | -6.93967 | -7.161   | -13.3693   | -13.312    | -1.625     | 18.93645   |
|              | 18         | 65.10067 | -20.2937 | -9.27333 | -13.768    | -26.666    | -3.73733   | 30.24237   |
|              | 24         | 68.25367 | -29.179  | -9.51767 | -10.615    | -35.5513   | -3.98167   | 37.31527   |
|              | 30         | 72.55233 | -31.4213 | -12.472  | -6.31634   | -37.7937   | -6.936     | 38.94054   |
|              | 36         | 70.253   | -31.0477 | -16.4977 | -8.61567   | -37.42     | -10.9617   | 39.933     |
|              | 42         | 69.05267 | -28.2427 | -17.2357 | -9.816     | -34.615    | -11.6997   | 37.8343    |

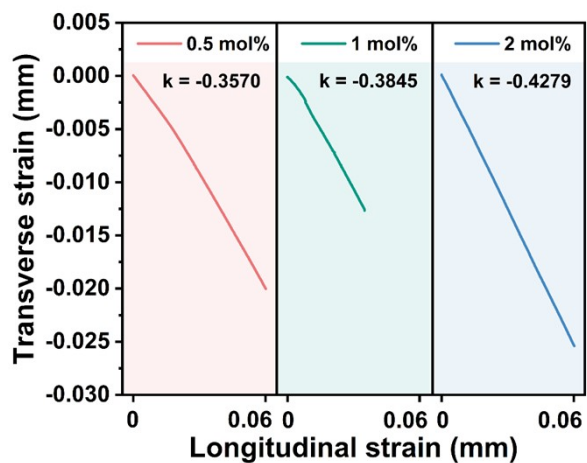

**Figure S10.** The curves of longitudinal strain-transverse strain to determine Poisson's ratio of PAV-Zn with different MBAA contents.

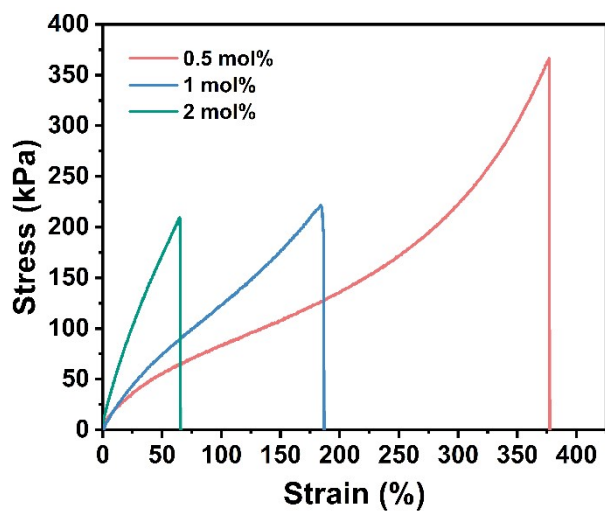

**Figure S11.** Stress-strain curves of PAV-Zn hydrogels with different concentrations of MBAA.



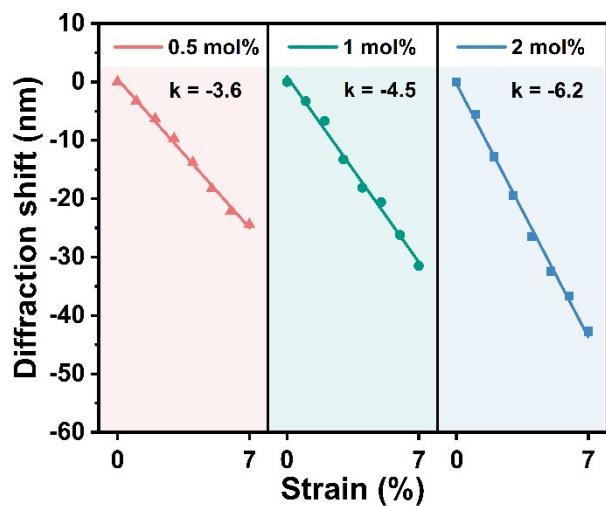

**Figure S12.** Sensitivity of PAV-Zn with different MBAA contents.

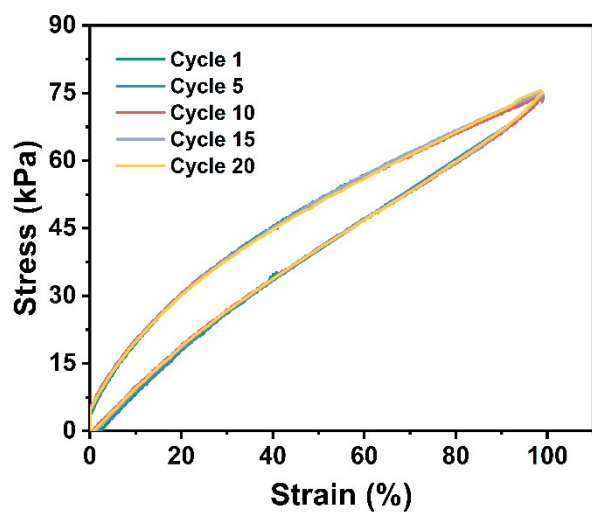

**Figure S13.** Stress-strain curves of PAV-Zn hydrogels with 0.5 mol% MBAA content subjected to 100% tensile strain for twenty cycles.

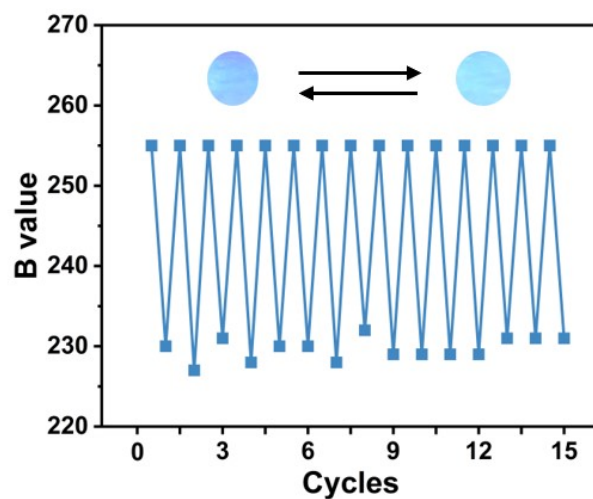

**Figure S14.** B-value of the structural color hydrogel with 1 mol% MBAA content subjected to 20%-60% tensile strain in fifteen cycles.

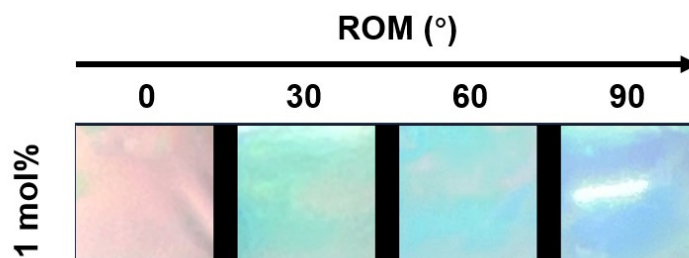

**Figure S15.** Photographs of structural color hydrogel with MBAA content of 1 mol% at finger ROM of 0-90°.
